# Supplementary material for: Hectometric-scale modelling of the urban mixed layer evaluated with a dense LiDAR-ceilometer network
Source: Copernicus journal article supplement (doi:10.5194/egusphere-2025-2064), 2025-05-20
Supplement: Supplementary file [file egusphere-2025-2064-AC1-supplement.pdf]

We thank the Reviewer for their comments. In the following we give :

*Black -reviewers comments*

*Purple - Our response*

### **Reviewer 1**

*This manuscript aims to evaluate hectometric-scale modeling of the urban mixing layer using an extensive ceilometer network. Specifically, it seeks to assess the model's ability to determine the urban ABL, focusing on the mixing layer height (MLH), by comparing simulated aerosol vertical profiles with ceilometer measurements using the same retrieval algorithm. The model's approach to determining ABL/MLH turbulent mixing and its relationship to aerosol vertical distribution is not adequately discussed. Therefore, it remains uncertain whether this evaluation is truly useful in evaluating the urban mixed layer. The study then assesses the model's ability to capture the spatial distribution of MLH and evaluates the urban smoke plume for two case study days. These results suggest that the model still does not accurately represent land characteristics, which is an important and interesting finding, supported by previous research. Additionally, the impact of this misrepresentation on urban plume transport is an important result, and further insights on this should be included. The manuscript would benefit from a more thorough discussion of the implications of these findings, explaining how these models are to be implemented and how the paper's findings may influence that implementation. Overall, the reviewer recommends publication after addressing major revisions.*

### **Major Comments:**

- 1) *The manuscript demonstrates an inconsistent use of terminology regarding the mixing layer height (MLH) and its relationship to the turbulent or thermodynamic ABL and aerosol distribution. While acknowledging that aerosol-based MLH may differ from thermodynamic MLH, the manuscript frequently equates them or uses them interchangeably. It is crucial to consistently differentiate between these terms.*

*While acknowledging there are three terms defining ABL height which are discussed in the Introduction, the authors are unsure at which points later in the manuscript there is inconsistency in the use of these terms. We have made changes at **L85-90** to more clearly define the differences between 'mixing height', 'mixed layer height', and thermodynamic ABL height with an additional reference added to Kotthaus et al. (2023a) which clearly discusses the differences in turbulence, aerosol, and thermodynamically based metrics for ABL height.*

*Removed the sentence (**@L75 of original manuscript**) to remove potential confusion regarding terminology.*

**L71-72:** *MLH is defined and is the only term used to refer to the aerosol based vertical extent of recent mixing throughout the manuscript.*

*As in **Figure 4** we show a thermodynamically based metric for ABL height ('BLD diagnostic') we clarify the text (**at L245**) - that this is distinct from MLH. These results are intended to highlight the difference between them in the late afternoon on 4 August, and discuss previous level of agreement (e.g. Kotthaus et al. 2018; Kotthaus et al. 2023a). ALC based MLH and thermodynamically derived ABL height is a focus of this paper. No other new metrics or terminology are introduced, and we consistently use the 'mixed-layer' or 'mixed layer height' terms, as this is the focus of this study.*

- 2) *Similarly, the authors should carefully consider the distinction between "mixed" (e.g. L70) and*

*"mixing" (e.g. L84) layers. The term "mixed layer" hints at a final, fully-mixed state, while the "mixing layer" generally describes the convective daytime ABL in the context of continuous mixing. Ensure clear and consistent usage of these terms throughout the manuscript.*

See also our response: **Major Comment 1**

Paragraph clarified (**L85-90**) as it is essential these terms are clearly distinguished.

We clarified the MLH definition (**L71-72**) ‘the vertical extent of recent mixing’ - i.e. the MLH involves turbulent processes which could be ongoing.

Following previous literature (e.g. Barlow et al. 2011, Scarino et al. 2014; de Bruine et al. 2017; Bonin et al. 2018; Kotthaus et al. 2018; Lean et al. 2022; Fenner et al. 2024) we distinguish between mixed layer height (MLH) and mixing height (MH). These are defined differently because of the atmospheric variables consider differ (expanded **L85-91**).

Earlier (**L38-43**) we addressed which measures we use for defining the ABL height.

- 3) *The term “aerosol layer height” may be more accurate than “mixed layer height” in this context, especially considering that, as shown in Figure 4 for instance (afternoon decay period), turbulence is no longer the dominant driver in the model. This suggests that the term “mixed layer” may not be appropriate when discussing the ZM or ceilometer-based ZO retrievals. When addressing the links to a thermodynamic ABL, then using the BLD would be more appropriate.*

Similarly with the studies listed in the response to **Major Comments 1 and 2**, there is a significant amount of literature using the term ‘mixed layer height’ based on aerosol measurements from ALCs (Scarino et al. 2014; de Bruine et al. 2017; Kotthaus et al. 2018; Lean et al. 2022; Fenner et al. 2024). We follow this terminology.

As our aim is to evaluate the model with ALC derived MLH, we develop MMLH (Section 3) following on from earlier forward operators (e.g. Warren et al. 2018; 2020) to ensure the model is comparing consistent variables to that observed (**L89-90**). In this study, the MLH is obtained from aerosol gradients to identify the ‘mixed layer’ from both MMLH-model and ALC-sensors, following previous literature.

As noted in the response to **Major Comment 1**, the Unified Model BLD diagnostic is used to illustrate the difference (Fig. 4) between an aerosol-based and a thermodynamic based metrics. Our goal is not to assess which is better/poorer but to highlight their difference – essential for all model evaluations and data assimilation that consistent model and observations variables are used.

- 4) *The manuscript mentions the use of a turbulence scheme but does not explain how it influences the simulation of ABL nor how a BLD is estimated. It is important to clarify how the model defines the vertical extent of surface aerosols and how the turbulence scheme interacts with this vertical distribution in order to better assess and evaluate the model, which is a stated objective of this study.*

Discussion has been added on the influence of the turbulence scheme on the simulations in the 100 and 300 m model (**L133-136**) and in the conclusions (**L423-424**).

Essentially, the influence of the turbulence scheme is through its partitioning between 3D and parameterized turbulence. In the 100 m domain a greater portion of the turbulence in the ABL will

be resolved by the 3D scheme and will happen earlier in the day (cf. 300 m). This is important for our results regarding the growth period in the morning and why the 100 m domain shows improvement over the 300 m.

Regarding the BLD diagnostic, the parcel method defines the BLD as the height to which an air parcel can rise dry adiabatically from the surface until it intersects with the environmental temperature profile (Holzworth 1964). Text added at **L245-248**.

The aerosol emissions are vertically distributed near the surface in the model, for most emissions (i.e. area sources) they are spread out across model vertical levels from the surface up to 150 m. For point sources, there is a distinction made for large and small sources, of which small sources are treated in the same way as area sources. For large point sources, emissions are spread evenly over model levels within a known minimum and maximum plume height for the source. If the plume heights are not known the minimum is set to 150 m and the maximum set to 365 m. Explanation added: **L147-150**.

- 5) *The manuscript lacks a detailed explanation of the aerosol prediction methods and aerosol scheme. A more thorough description of these processes is essential for a comprehensive assessment of the model's capabilities in simulating the urban boundary layer and urban plume.*

More thorough description of the aerosol scheme now given: **L142-146**.

The aerosol scheme treats the pollutants as a single-aerosol species, which is a prognostic quantity that is advected and mixed in the model consistent with other scalars. Removal of aerosol is accounted for via precipitation (although not relevant for these cases) and non-emitted sources via conversion factors.

- 6) *The manuscript uses both the CABAM and STRATfinder algorithms for ALC retrievals. While both algorithms aim to retrieve the Z<sub>O</sub>, the differences between them and the implications of using two separate algorithms should be discussed. It is important to address how these differences may affect the comparison to the Z<sub>M</sub>, as this could influence the results and interpretation.*

Kotthaus et al. (2020) note these MLH algorithms are tailored to specific ALC types for implementation across diverse ALC sensor network (i.e. as *urbisphere*-Berlin had). From Kotthaus et al.'s (2020) detailed analyses of differences, they conclude there is very good agreement in MLH from high (e.g. CL61, CHM15k - STRATfinder) and lower SNR ALC (e.g. CL31 - CABAM) in diverse ABL conditions. The largest discrepancy occurs in the evening and early morning when detecting shallow layers due to the ALC differences in SNR and optical overlap. Additionally, STRATfinder has a delayed decline in the mixed layer around sunset (cf. CABAM), likely due to challenges of tracking very subtle gradients in attenuated backscatter as a shallow nocturnal layer forms. Discussion added (**Section 2.3**) **L180-187**.

- 7) *Section 4 would benefit from specific quantitative values when discussing over- and underestimations. This would provide a clearer understanding of the magnitude of these errors and allow for a more precise evaluation of the model's performance.*

**Added Tables 2 and 3 to supplement analysis of Fig. 7 and 8 along with text and appropriate references in Sections 4.2 and 5.** The tables give metrics for various station groupings used to evaluate Z<sub>M</sub> using the Z<sub>O</sub> data. These spatial groupings are used to analyse the maximum MLH and

growth rates, following the same methodology as Kotthaus and Grimmond (2018b). The analysis is much improved with these results.

**Table 1.** Comparison between  $Z_o$  and  $Z_m$  (100 and 300 m domains) for 18 April using various spatial groupings of sites: Rings (A,B,C), and rural sites (Ring C) split into upwind (Up) / downwind (Do) / Other (Ot), showing the mean and (number of sites analysed) in each column, and the mean bias error (MBE,  $Z_m - Z_o$ ) for three time periods (03:00-05:00, 15:00-17:00, 20:00-22:00). The Growth rate (Kotthaus and Grimmond, 2018b) and Maximum are also given. Significant difference testing uses Kruskal-Wallis (1952) with subsequent post hoc testing following Dunn (1964), and Holm (1979). Rings A and B are classified as 'City' for the purpose of significance testing with the Up, Do, and Ot groups.

|                                             | A        | B        | C         | Upwind   | Downwind | Other    | Significant Difference                          |
|---------------------------------------------|----------|----------|-----------|----------|----------|----------|-------------------------------------------------|
| <b>03:00-05:00</b>                          |          |          |           |          |          |          |                                                 |
| $Z_o$                                       | 116 (4)  | 116 (4)  | 131 (3)   | (0)      | (0)      | 131 (3)  | A-B; A-C; B-C                                   |
| $Z_m$ 300 m                                 | 205 (5)  | 170 (5)  | 155 (11)  | 233 (1)  | 143 (3)  | 150 (7)  | A-B; A-C; B-C; Do-City; Ot-City; Do-Up; Up-Ot   |
| $Z_m$ 100 m                                 | 162 (5)  | 139 (5)  | 34 (2)    | (0)      | (0)      | 34 (2)   | A-B; A-C; B-C                                   |
| MBE 300 m                                   | 76 (4)   | 50 (4)   | 5 (3)     | (0)      | (0)      | 5 (3)    |                                                 |
| MBE 100 m                                   | 44 (4)   | 24 (4)   | -52 (1)   | (0)      | (0)      | -52 (1)  |                                                 |
| <b>Growth rate (<math>m\ h^{-1}</math>)</b> |          |          |           |          |          |          |                                                 |
| $Z_o$                                       | 379 (5)  | 273 (5)  | 449 (10)  | 366 (5)  | 435 (2)  | 596 (3)  |                                                 |
| $Z_m$ 300 m                                 | 551 (5)  | 558 (5)  | 348 (11)  | 371 (5)  | 372 (2)  | 306 (4)  |                                                 |
| $Z_m$ 100 m                                 | 548 (5)  | 473 (5)  | 633 (2)   | 633 (2)  | (0)      | (0)      |                                                 |
| <b>15:00-17:00</b>                          |          |          |           |          |          |          |                                                 |
| $Z_o$                                       | 3335 (3) | 3210 (2) | 3342 (9)  | 3393 (5) | 3525 (1) | 3196 (3) | A-B; B-C; Do-Ot; Ot-Up; Up-City                 |
| $Z_m$ 300 m                                 | 3622 (5) | 3578 (5) | 3943 (11) | 3890 (6) | 3407 (2) | 4406 (3) | A-C; B-C; Do-Ot; Do-Up; Up-Ot; Up-City; Ot-City |
| $Z_m$ 100 m                                 | 3611 (5) | 3479 (5) | 3528 (2)  | 3528 (2) | (0)      | (0)      |                                                 |
| MBE 300 m                                   | 311 (3)  | 401 (2)  | 684 (9)   | 546 (5)  | -278 (1) | 1235 (3) |                                                 |
| MBE 100 m                                   | 264 (3)  | 299 (2)  | 185 (2)   | 185 (2)  | (0)      | (0)      |                                                 |
| <b>Maximum (m)</b>                          |          |          |           |          |          |          |                                                 |
| $Z_o$                                       | 3417 (3) | 3365 (2) | 3575 (9)  | 3676 (5) | 3617 (1) | 3392 (3) |                                                 |
| $Z_m$ 300 m                                 | 3937 (5) | 3892 (5) | 4496 (11) | 4491 (6) | 3733 (2) | 5014 (3) |                                                 |
| $Z_m$ 100 m                                 | 3830 (5) | 3751 (5) | 3700 (2)  | 3700 (2) | (0)      | (0)      |                                                 |
| <b>20:00-22:00</b>                          |          |          |           |          |          |          |                                                 |
| $Z_o$                                       | 377 (4)  | 420 (4)  | 354 (7)   | 205 (3)  | 520 (3)  | 302 (1)  | Do-Up; Do-City; Up-City                         |
| $Z_m$ 300 m                                 | 289 (5)  | 194 (5)  | 184 (11)  | 148 (6)  | 233 (3)  | 218 (2)  | A-B; A-C; Do-Up; Up-City                        |
| $Z_m$ 100 m                                 | 232 (5)  | 149 (5)  | 24 (2)    | 24 (2)   | (0)      | (0)      | A-B; A-C; B-C                                   |
| MBE 300 m                                   | -138 (4) | -209 (4) | -135 (7)  | -74 (3)  | -245 (3) | 10 (1)   |                                                 |
| MBE 100 m                                   | -168 (4) | -222 (4) | -129 (1)  | -129 (1) | (0)      | (0)      |                                                 |

**Table 2.** As Table 2, but for 4 August case with 15:00-17:00 (instead of 13:00-15:00) as maximum MLH peaks generally later on this day.

|                                             | A        | B        | C         | Upwind   | Downwind | Other    | Significant Difference                                        |
|---------------------------------------------|----------|----------|-----------|----------|----------|----------|---------------------------------------------------------------|
| <b>03:00-05:00</b>                          |          |          |           |          |          |          |                                                               |
| $Z_o$                                       | 242 (5)  | 255 (5)  | 237 (5)   | 123 (2)  | 312 (3)  | (0)      |                                                               |
| $Z_m$ 300 m                                 | 175 (5)  | 160 (5)  | 155 (14)  | 254 (5)  | 97 (7)   | 112 (2)  | A-C; B-C; Up-City; Do-City; Ot-City; Up-Ot; Do-Up             |
| $Z_m$ 100 m                                 | 170 (5)  | 133 (5)  | 68 (3)    | 42 (1)   | 82 (2)   | (0)      | A-C; B-C                                                      |
| MBE 300 m                                   | -59 (5)  | -85 (5)  | -44 (5)   | 156 (2)  | -178 (3) | (0)      |                                                               |
| MBE 100 m                                   | -75 (5)  | -117 (5) | -99 (3)   | -99 (1)  | -99 (2)  | (0)      |                                                               |
| <b>Growth rate (<math>m\ h^{-1}</math>)</b> |          |          |           |          |          |          |                                                               |
| $Z_o$                                       | 307 (5)  | 262 (5)  | 285 (14)  | 282 (4)  | 279 (7)  | 301 (3)  |                                                               |
| $Z_m$ 300 m                                 | 306 (5)  | 320 (5)  | 302 (14)  | 207 (4)  | 339 (7)  | 340 (3)  |                                                               |
| $Z_m$ 100 m                                 | 246 (5)  | 279 (5)  | 246 (3)   | 219 (1)  | 259 (2)  | (0)      |                                                               |
| <b>13:00-15:00</b>                          |          |          |           |          |          |          |                                                               |
| $Z_o$                                       | 1730 (5) | 1734 (5) | 1737 (14) | 1506 (3) | 1824 (6) | 1770 (5) | Do-Ot; Do-City; Do-Up                                         |
| $Z_m$ 300 m                                 | 1755 (5) | 1725 (5) | 1837 (14) | 1605 (3) | 1887 (6) | 1916 (5) | A-C; B-C; Do-Ot; Do-Up; Do-City; Ot-City                      |
| $Z_m$ 100 m                                 | 1733 (5) | 1734 (5) | 1712 (3)  | 1600 (1) | 1768 (2) | (0)      |                                                               |
| MBE 300 m                                   | 18 (5)   | -2 (5)   | 98 (14)   | 99 (3)   | 52 (6)   | 152 (5)  |                                                               |
| MBE 100 m                                   | 3 (5)    | -8 (5)   | -72 (3)   | 127 (1)  | -172 (2) | (0)      |                                                               |
| <b>Maximum (m)</b>                          |          |          |           |          |          |          |                                                               |
| $Z_o$                                       | 1795 (5) | 1826 (5) | 1846 (14) | 1626 (3) | 1933 (6) | 1873 (5) | Up-Do                                                         |
| $Z_m$ 300 m                                 | 1755 (5) | 1755 (5) | 1870 (14) | 1605 (3) | 1913 (6) | 1977 (5) | Up-Do; Up-Ot; Do-City; Ot-City                                |
| $Z_m$ 100 m                                 | 1761 (5) | 1775 (5) | 1734 (3)  | 1666 (1) | 1768 (2) | (0)      |                                                               |
| <b>20:00-22:00</b>                          |          |          |           |          |          |          |                                                               |
| $Z_o$                                       | 382 (5)  | 312 (4)  | 321 (13)  | 316 (2)  | 332 (3)  | 318 (8)  | A-C; B-C; Ot-City; Up-City; Do-City                           |
| $Z_m$ 300 m                                 | 308 (5)  | 300 (5)  | 119 (14)  | 180 (2)  | 84 (4)   | 121 (8)  | A-C; A-B; B-C; Do-City; Ot-City; Up-Ot; Up-City; Do-Up; Do-Ot |

|             |          |          |           |          |          |         |          |
|-------------|----------|----------|-----------|----------|----------|---------|----------|
| $Z_m$ 100 m | 272 (5)  | 228 (5)  | 38 (3)    | (0)      | 16 (1)   | 49 (2)  | A-C; A-B |
| MBE 300 m   | -46 (5)  | -78 (4)  | -202 (13) | -122 (2) | -256 (3) | -202(8) |          |
| MBE 100 m   | -113 (5) | -160 (4) | -266 (3)  | (0)      | -317 (1) | -241(2) |          |

8) *How much of the bias can be attributed to differences in vertical resolution between ceilometers and models? This should be addressed earlier in the manuscript to assess the extent of the biases presented.*

The data processing of the ALC backscatter for the STRATfinder algorithm yield a constant vertical spacing of 30 m up to ~15km height. For CABAM the vertical spacing is maintained for the original CL31 range gates which is 10 m up to ~7.5 km height. This has been added to **L186-187**. Comparing these to the model levels of our simulations is shown in the figure below. ‘0p3\_L70’ is notation for the 300 m domain with 70 vertical levels, and ‘0p1\_L140’ is the 100 m domain with 140 vertical levels. A description of the model vertical spacing has been added at **L123-124**. The left figure shows the vertical spacing in the lowest 1000 m along with the minimum MLH found among the ALC sites for ZO, and ZM. The lowest MLH diagnosed from any of the ALC data was 68 m, and for the model this was 75 and 16 m for the 300 m and 100 m domains, respectively. At these very low heights (< 200 m) the vertical spacing between the ALC and model is comparable. In terms of the biases found, if we look at Table 2 and 3 for the results during early morning (03:00-05:00) when we might expect these lowest values to occur, the MBE are generally of an order larger than any difference in vertical spacing. However, the MBE is somewhat smaller for the August case (Table 3), and the difference between CABAM and the 300 m domain in terms of vertical spacing is similar to the MBE.

In the right figure, the 99th percentile of MLHs from the ALC sites is shown as a horizontal line for ZO, and ZM. For the ALC measurements this was nearly 3700 m (from the August case), 4800 m from the 300 m domain, and 4100 m from the 100 m domain. At these heights the 100 m and ALC data have a difference in vertical spacing of around 100 m, and for the 300 m domain this is ~250 m. Looking at the MBEs for the August case for afternoon (15:00-17:00; Table 3) the differences between ZO, and ZM are generally larger than these differences in vertical spacing and when looking at the differences in the ‘Maximum’ in Table 3, the differences between ZO, and ZM are again larger than differences in vertical spacing. The sign of MBE across groups at different times in Tables 2 and 3 is very consistent, giving confidence that there is a clear result between ZO, and ZM that is not significantly impacted by differences in vertical spacing. However, because the differences in vertical spacing and MBE are at times of the same order (e.g. 03:00-05:00 August case) we cannot rule out an impact from this. This discussion has been added in **Section 5 L454-458** and the figure below has been added in **Supplemental Material Figure S7** and referenced in the discussion in **Section 5**.

Figure S7 A comparison of the vertical spacing of data used for MLH in this study for (left) the first 1000 m in CABAM (dotted blue), STRATfinder (dotted red), the 300 m domain (‘0p3\_L70’, solid dark blue), and the 100 m domain (‘0p1\_L140’; dashed dark blue). Brown lines indicate the minimum MLH detected at any site by MMLH ( $Z_m$ ) in the 300 m (dashed brown), and 100 m domains (dotted brown), and for all ALC observations ( $Z_o$ , solid brown). (Right) Vertical spacing with height up to 6000 m with brown lines indicating the same as in the left but now showing the height of the 99th percentile of MLH among all

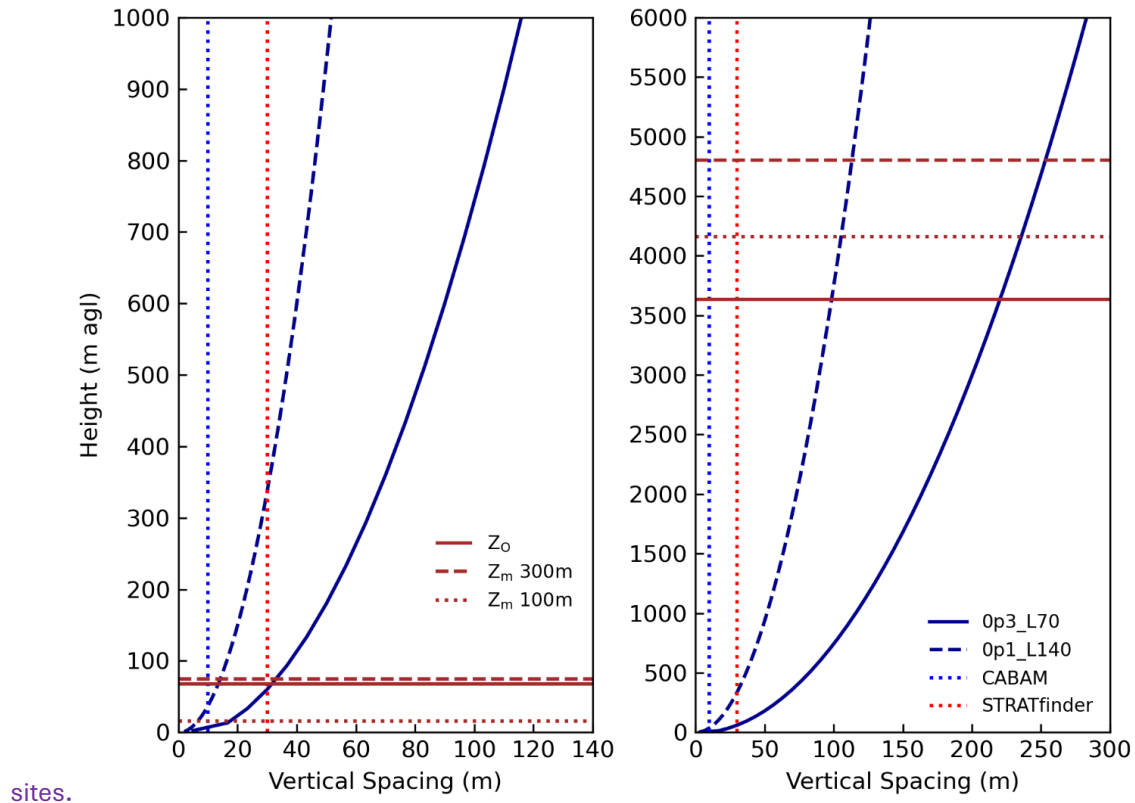

- 9) Section 5 should be revised in light of the points above. If the authors can better support the rationale for using simulated aerosols for MLH, and ensure that the definitions of thermodynamic and aerosol-based layers are consistent, the manuscript will be clearer and more coherent.

We have revised the manuscript in light of these points regarding the responses to **Major Comments 1, 2, and 3.**

- 10) The manuscript's title, 'Hectometric-scale modelling of the urban mixed layer evaluated with a dense LiDAR-ceilometer network,' suggests a primary focus on the urban mixed layer. However, a substantial part of the manuscript is dedicated to evaluating the urban plume. A revision of the manuscript's stated goals to ensure better alignment between the title and the content is needed.

Our stated focuses include both the urban plume (**L101**) and to evaluate the variability of MLH between urban and rural areas (**L100**), both are concerned with the MLH in an urban region. We modify the title '**Hectometric-scale modelling of the mixed layer in an urban region evaluated with a dense LiDAR-ceilometer network**' to better reflect these goals. Clarification of goals added in the abstract **L16-17**.

- 11) Furthermore, if a central goal is to investigate the simulation of the plume, it is crucial for the authors to explain why the analysis predominantly focuses on the top of the aerosol layer (identified as ZM/ZO) rather than providing an examination of the full vertical and spatial distribution of aerosols. A detailed analysis of the entire plume's structure would offer a more complete understanding of the model's performance in simulating urban aerosol transport.



There are two main stated goals of the paper which we address in the response to **Major comment 10**. The algorithms used are designed to identify the aerosol layers associated with a MLH. During growth conditions there is typically an abrupt decrease in aerosol concentration above the mixed layer. At night multiple aerosol layers may be present, and the algorithms are designed to identify the layer most likely associated with the MLH. We analyse the manifestation of the urban plume through our MLH observations and simulations, but our focus is not on the detailed plume structure (e.g. thermodynamic profile). However, Fig. 9-12 do present qualitative analysis of the thermodynamic and aerosol structure of the plume. Our future work will involve more detailed analyses on urban plume controls, structure, and thermodynamic profile stability.

12) *The misrepresentation of soil moisture in the model is repeated throughout the manuscript, it would be helpful to see the extent of this misrepresentation and how it may relate to the findings in the study.*

Supplemental S2 gives the methods used to adjust the bias in soil moisture over urban areas for the simulation. Figure S3 presents observed soil moisture profiles in comparison with the model at an urban site to demonstrate that the adjusted soil moisture profile is in general agreement with other observed profiles around Berlin.

#### **Minor Comments:**

- *There is a discrepancy between the text and figure captions for Figures 4, 6, 7, and 8, where it appears that the images for 300m and 100m simulations were swapped.*

Fixed

- *Figures 7, 8, 9, 10, 11, and 12 are difficult to interpret. Increasing their size and resolution, especially for the ALC circle markers, would improve clarity, as it is currently hard to see the bias shading.*

To improve readability the size of the labels in Fig. 9-12 are increased, as are marker sizes in Fig. 7 and 8 (bottom rows).

- *Section 2.1 would benefit from a more detailed description of the region under study.*

It was felt that this detail could be more suited for Section 2.3 and have added this at lines **L177-179**.

- *Regarding Figure 1, was the synoptic setup validated using observational data or reanalysis?*

Comparing **Fig. R1** (ERA5) and Fig. 1 we can see April (left) wind flows are very similar, but the cooler airmass to the northeast which is advecting into the Berlin region is delayed and less robust (cf. global UM). This results in a warmer airmass ( $\sim 2\text{ C}^\circ$  at 850 hPa) in the Berlin region in the afternoon, which is not expected to significantly impact our MLH assessment. The regional flow regime is more important to capture. In August (right) we see a very similar setup (cf. Fig. 1b), with the advection of a warm airmass from the southwest captured.

Fig. R1: As Figure 1, but using ERA5 (Hersbach et al. 2020) for (left) April and (right) August cases.

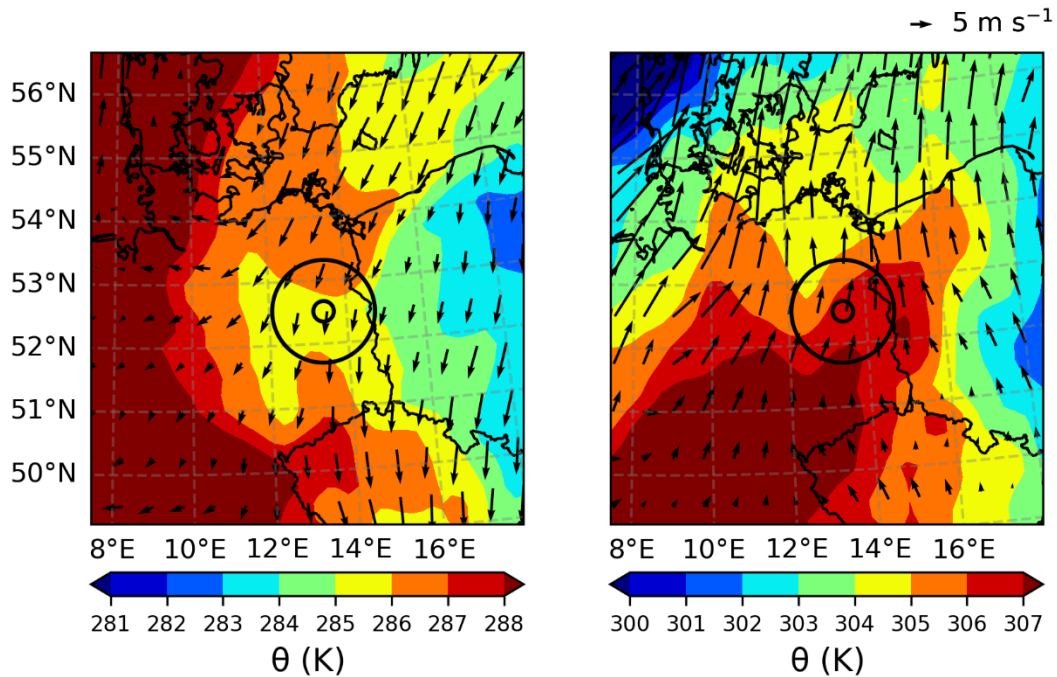

- The caption for Figure 2 is unclear and should be revised for clarity.

Updated

**Figure 2.** Berlin study area with (a) the extent of the three nested model domain (brown, 100 m, 300 m, and 1.5 km) and rings B and C (black circles) around Berlin (red star), and (b) location of the 25 ALC sites (blue, with WEDD [Wedding] - yellow star) with the 300 m domain model dominant land-cover (colour, BL = Broadleaf, NL = Needleleaf) and orography (30 m contours), plus the A to C rings (black circles) at 6, 18 and 90 km radius from Berlin centre, locating Inner city, Outer city and rural areas, respectively (Fenner et al. 2024) and extent of 100 m model domain (brown box).

- It would be helpful to label parts A, B, and C in Figure 2 for better clarity. In Figure 2b the labels for the rings A, B and C are now **bold** to improve clarity.

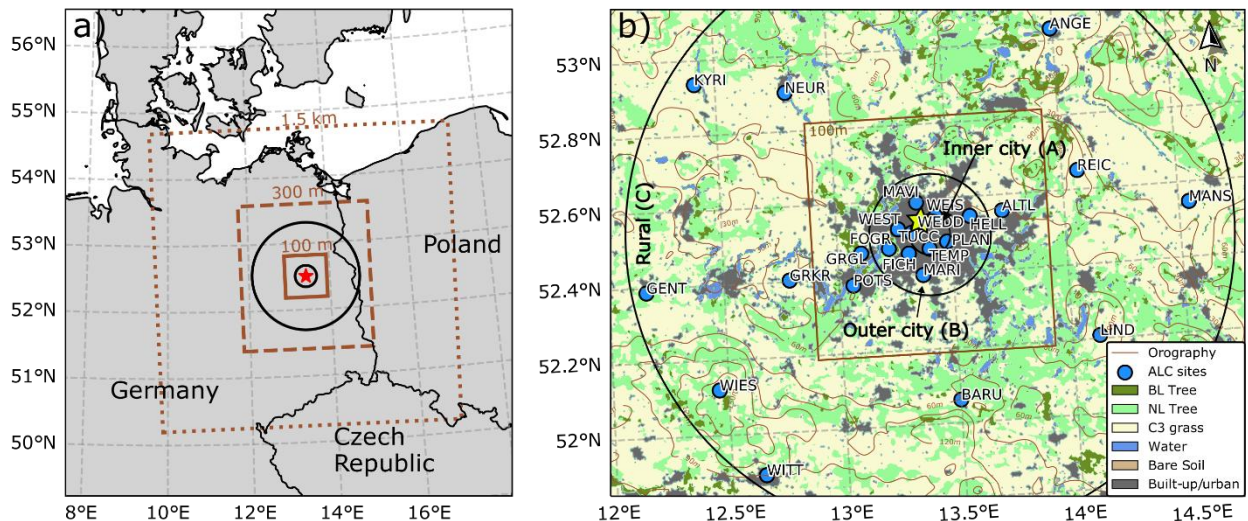

- L168 requires a reference for the statement. The claim that CL31 and CL51 sensors “reach sufficient overlap at lower heights” is questionable, as these systems typically achieve overlap at approximately 100m. These sensors also have known artifacts and signal issues, as noted by



Kotthaus et al. (2016) - “Recommendations for processing atmospheric attenuated backscatter profiles from Vaisala CL31 ceilometers”.

From Kotthaus et al. (2020): ‘The CL31 reaches complete optical overlap at ~70 m range; however, corrections for near-range artefacts are necessary.’ These corrections for near-range artefacts are developed in Kotthaus et al. (2016) and Kotthaus and Grimmond (2018a) and were applied in this study. For CL61 the overlap (from PROBE <https://zenodo.org/records/11211873>) is 35 m.

**L191** is meant to draw comparison between the CHM15k and CL31/61, and to state that the CHM15k optical overlap is incomplete <200 m (cf. CL31/61 which is ~70 m).

Reference (Kotthaus et al. 2020) added (**L192**) to support this.

- **L214:** Should this refer to Figure 4b?  
Yes, done.
- **L221:** how is the BLD defined or simulated?

Addressed in response **Major Comment 4**. Description of the BLD is added (**L245-248**).

- For Figure 5, it would be useful to describe the image in order of a, b, c, and d.  
Done.
- In L281-282, the references to Figures 7c and 7g are unclear regarding the 'shallow downwind' and 'high upwind' values. The visibility of markers in these figures is poor, making it difficult to discern the discussed trends. To improve clarity, it would be beneficial to include specific quantitative values in the text to support these observations.

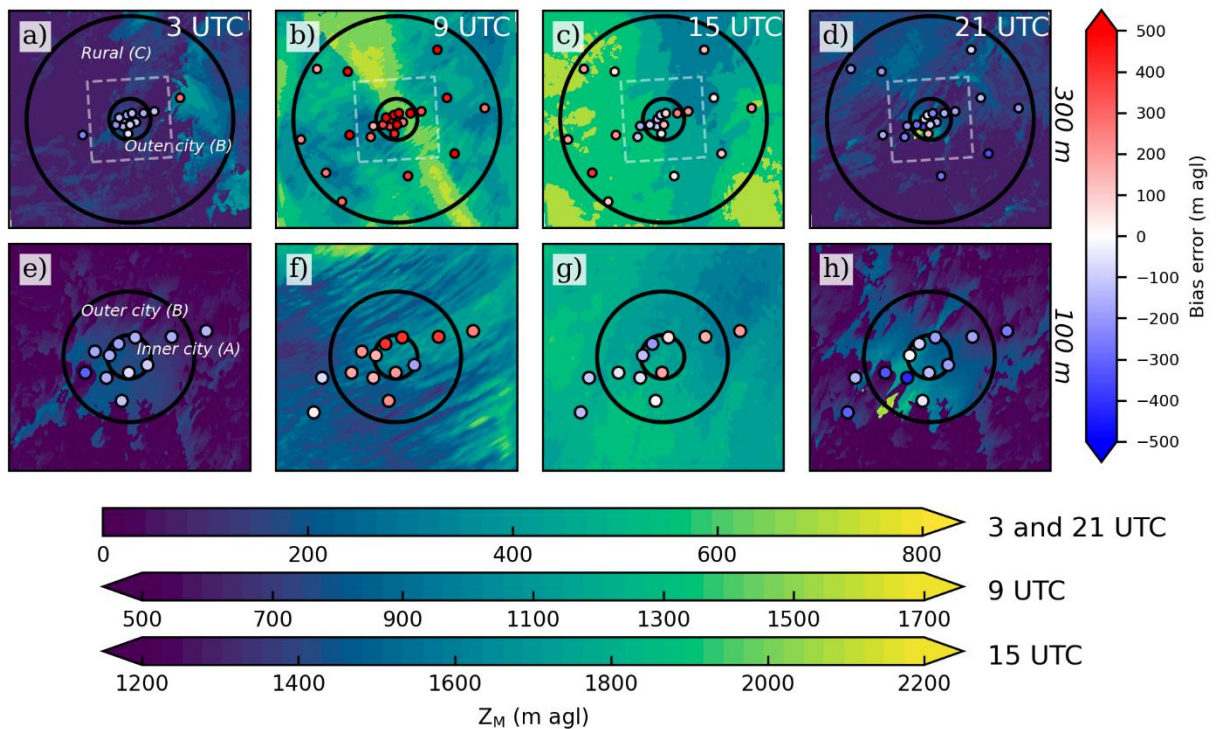

Fig. 7 and 8 markers for the 100 m data are enlarged, but not for 300 m as some stations would be unreadable.

Quantitative analysis added (Tables 2 and 3) and addressed in **Major Comment 7**.

References not in text:

de Bruine, M., Apituley, A., Donovan, D. P., Klein Baltink, H., and de Haij, M. J.: Pathfinder: applying graph theory to consistent tracking of daytime mixed layer height with backscatter lidar, *Atmos. Meas. Tech.*, 10, 1893–1909, <https://doi.org/10.5194/amt-10-1893-2017>, 2017.

Hersbach H, Bell B, Berrisford P, et al. The ERA5 global reanalysis. *Q J R Meteorol Soc.*; 146: 1999–2049. <https://doi.org/10.1002/qj.3803>, 2020.
